# Supplementary material for: Rotaxane-type resorcinarene tetramers as histone-sensing fluorescent receptors
Source: Royal Society of Chemistry journal article supplement (doi:10.1039/b804431g), 2008-01-01
Supplement: b804431g.pdf [file b804431g.pdf]

Rotaxane-type resorcinarene tetramers as a histone-sensing fluorescent receptor

*Osamu Hayashida*<sup>\*,‡,§</sup> and *Masaki Uchiyama*<sup>‡</sup>

<sup>†</sup>Institute for Materials Chemistry and Engineering, <sup>‡</sup>Department of Chemistry and

Biochemistry, Kyushu University, Moto-oka 744, Fukuoka 819-0395, Japan

<sup>§</sup>PRESTO, JST, Sanbancho bldg., 5-Sanbancho, Chiyodaku, Tokyo 102-0075, Japan

| <b>Table of Contents</b>                               | <b>Page:</b> |
|--------------------------------------------------------|--------------|
| Computer-generated CPK models                          | S2           |
| Concentration dependency of fluorescence spectra       | S3           |
| Fluorescence titration experiments with other proteins | S4           |
| FRET titration experiments with other proteins         | S5           |

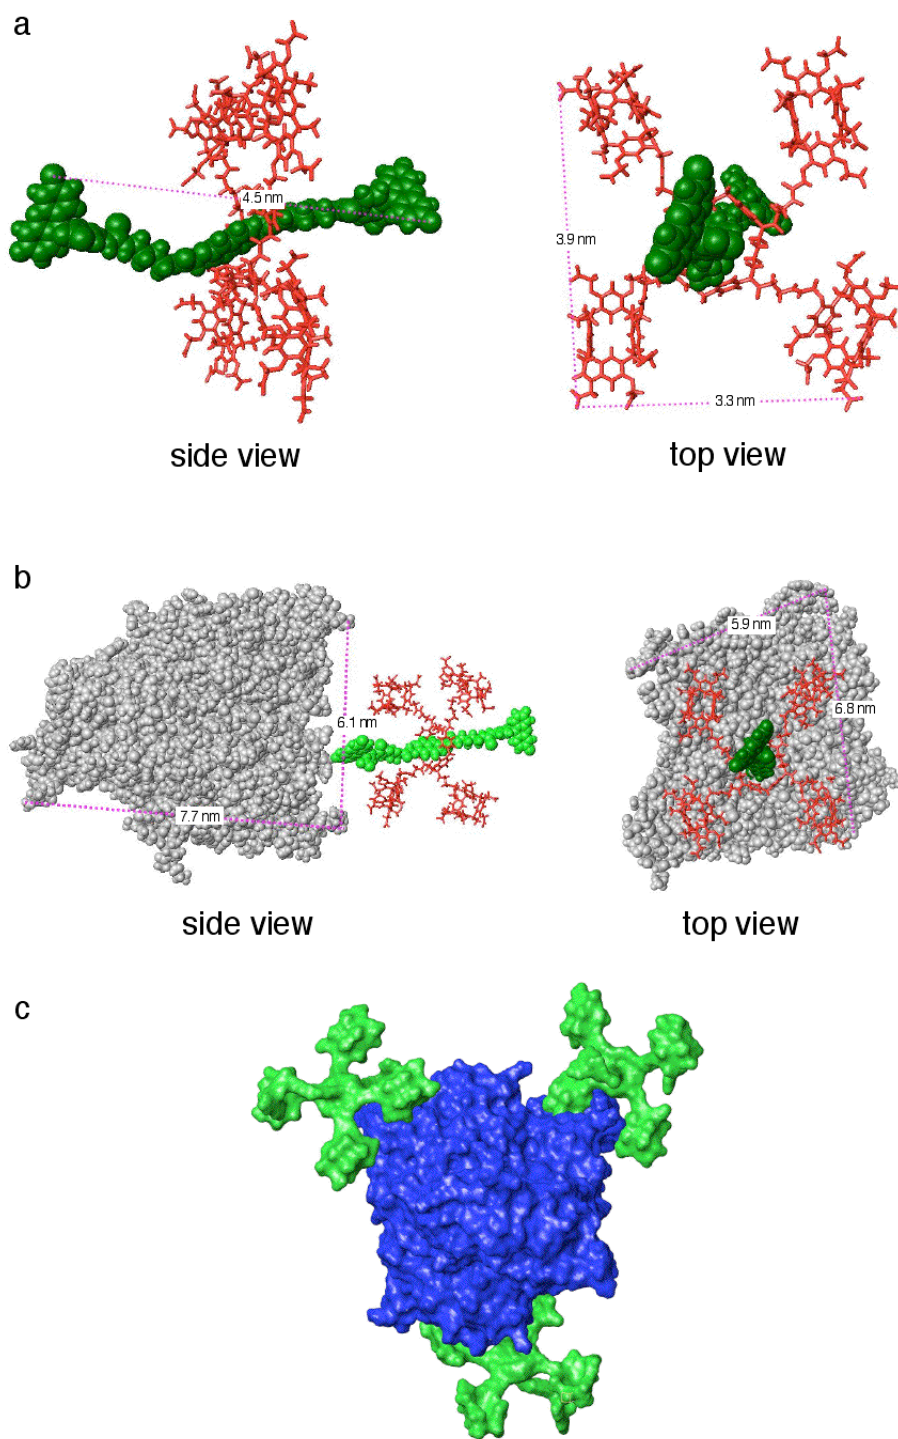

**Figure S1.** Computer-generated CPK models for **1** (a) and **1**-histone complexes (b), and surface geometry for 3:1 complex of **1** with histone.

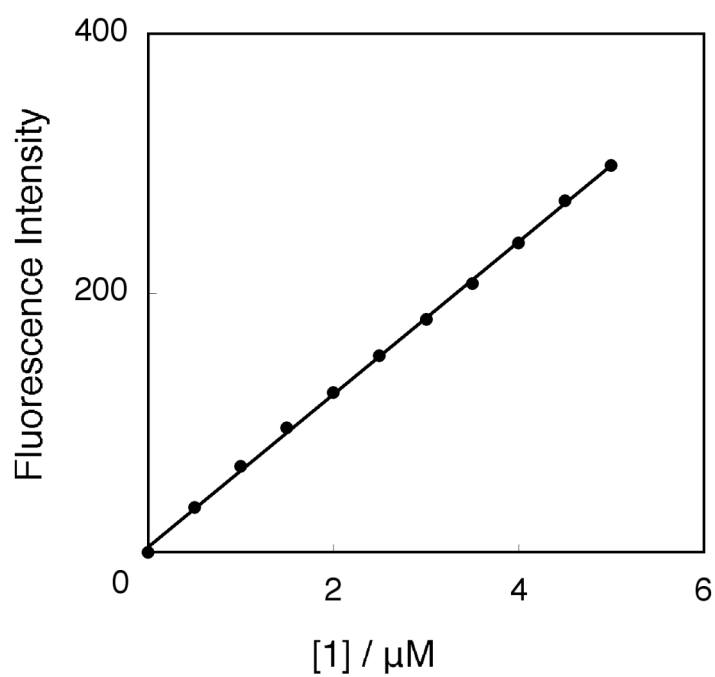

**Figure S2.** A correlation of the fluorescence intensity at 518 nm with [1].

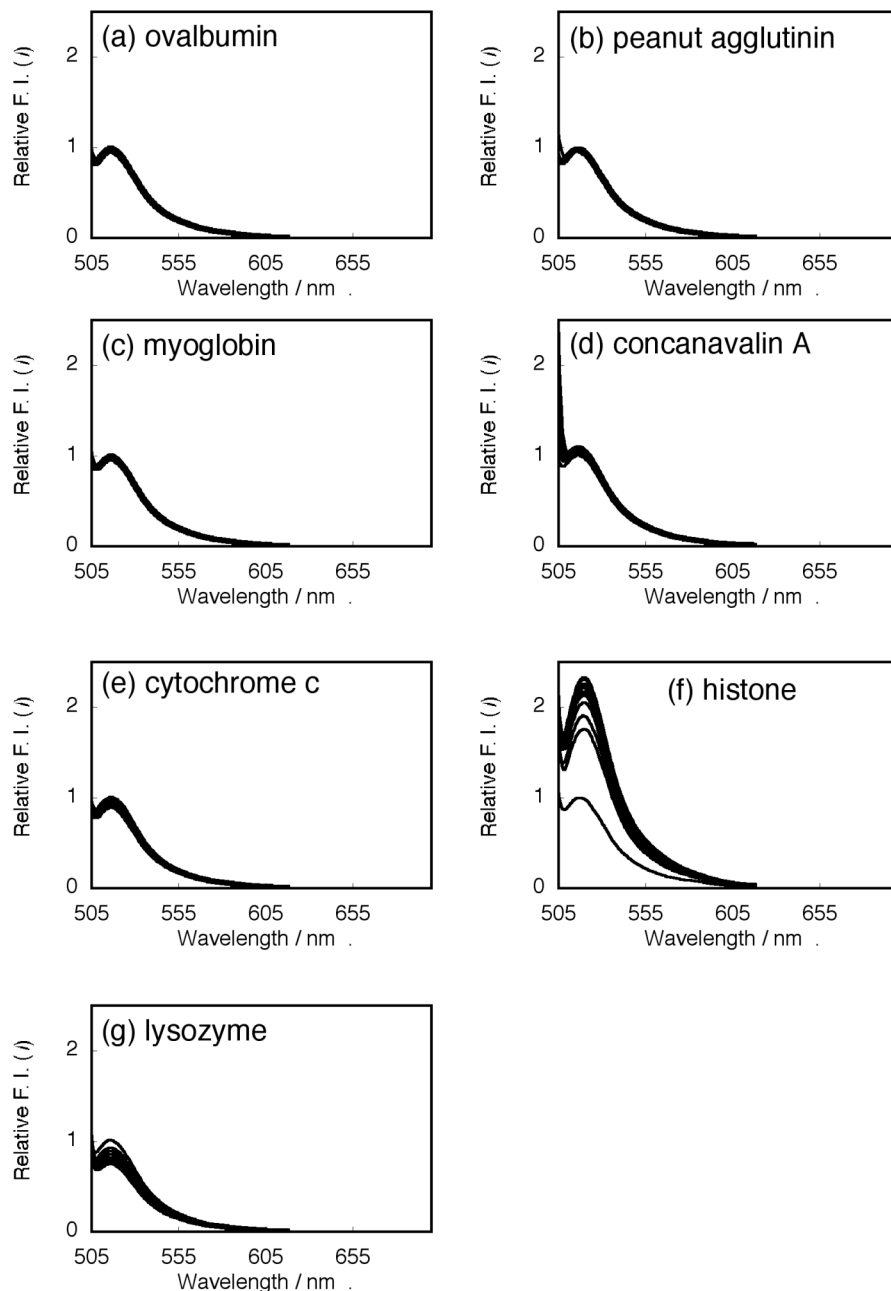

**Figure S3.** Fluorescence spectral changes for aqueous solution of **1** (0.1  $\mu\text{M}$ ) upon addition of ovalbumin (a), peanut agglutinin (b), myoglobin (c), concanavalin A (d), cytochrome c (e), histone (f), and lysozyme (g) in HEPES (0.01 M, pH 7.4, with 0.15 M NaCl) at 298K; [protein] = 0, 0.3, 0.6, 0.9, 1.2, 1.5, 1.8, 2.1, 2.4, 2.7, and 3.0  $\mu\text{M}$ . Ex, 488 nm.

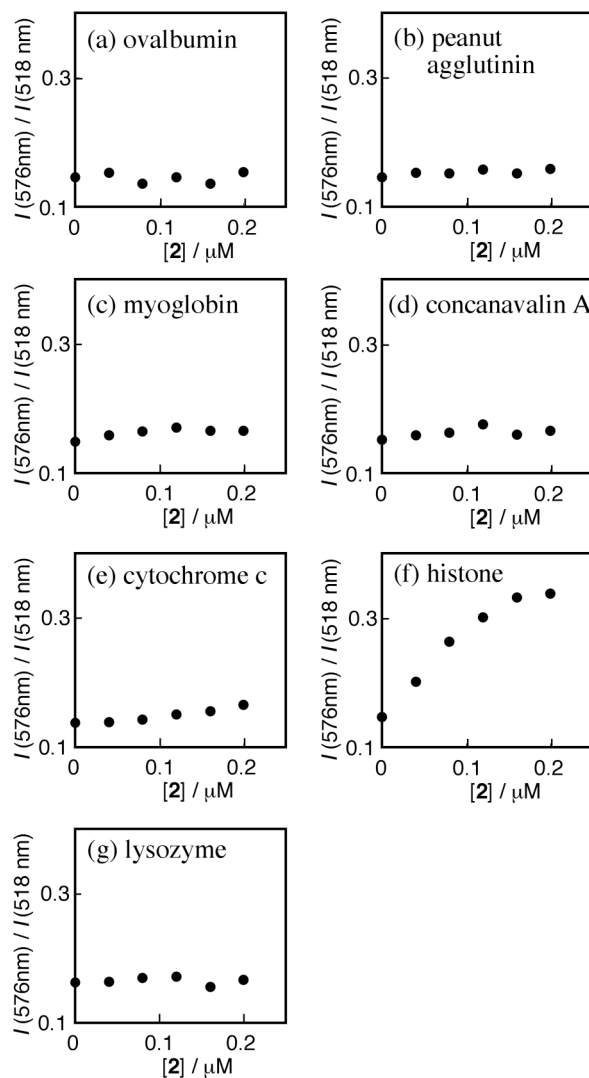

**Figure S4.** Titration curves of the fluorescence spectral changes for an aqueous solution containing **1** ( $0.2\ \mu\text{M}$ ) and individual proteins ( $0.6\ \mu\text{M}$ ) upon addition of **2**,  $[2] = 0, 0.04, 0.08, 0.12, 0.16$ , and  $0.20\ \mu\text{M}$ . Ex, 430 nm. ovalbumin (a), peanut agglutinin (b), myoglobin (c), concanavalin A(d), cytochrome c (e), histone (f), and lysozyme (g).
